# Supplementary material for: Response to Electrostimulation Is Impaired in Muscle Cells from Patients with Chronic Obstructive Pulmonary Disease
Source: MDPI journal article supplement (doi:10.3390/cells10113002), 2021-11-03
Supplement: s1 [file s1]

**Table S1. Primer sequences.**

| Gene                 | Forward primer          | Reverse primer        |
|----------------------|-------------------------|-----------------------|
| MuRF1                | AAACAGGAGTGCTCCAGTCGG   | CGCCACCAGCATGGAGATACA |
| atrogin1             | CGACCTCAGCAGTTACTGCAA   | TTTGCTATCAGCTCCAACAG  |
| SQSTM1               | GCACCTGTCTGAGGGCTTCT    | GCTCCAGTTTCCTGGTGGAC  |
| BNIP3                | CTGAAACAGATACCCATAGCATT | CCGACTTGACCAATCCCA    |
| GABARAPL1            | GGTCCCCGTGATTGTAGAGA    | GGAGGGGATGGTGTTGTTGAC |
| mTOR                 | GGGGACACTTTTACCGCTGA    | AATCAGACAGGCACGAAGGG  |
| p16 <sup>INK4a</sup> | GAAGGTCCCTCAGACATCCCC   | CCCTGTAGGACCTTCGGTGAC |
| p21                  | ACTCTCAGGGTCGAAAACGG    | CTTCCTGTGGGCGGATTAGG  |
| Myf5                 | TGATGGCATGCCCCGAATGTA   | CAGGTTGCTCTGAGGAGGTG  |
| MyoD                 | ACAACGGACGACTTCTATGAC   | TGCTCTTCGGGTTTCAGGA   |
| PGC1 $\alpha$        | ACGCACCGAAATTCTCCCTT    | TCTGTCCGTGTTGTGTCAGG  |
| TFAM                 | GGCACAGGAAACCAGTTAGG    | CAGAACACCGTGGCTTCTAC  |
| SOD1                 | GCCAAAGGATGAAGAGAGG     | ACCACAAGCCAAACGAC     |
| SOD2                 | AGCACGCTTACTACCTTC      | CTTTCAGTTACATTCTCCCAG |
| catalase             | CTTTGCTGAGGTTGAACAGA    | CACCCTGATTGTCCTGC     |
| GPx4                 | CTTCACCAAGTTCCTCATCG    | GTCCTTCTCTATCACCAGGG  |
| MFN2                 | CTGTGCGGAGTCAGATAGA     | CATTGTAGCCCATCAAGG    |
| DRP1                 | AGAACCAACCACAGGCAA      | AACAGGAACTGGCACAT     |
